# Supplementary material for: Free Radical-Mediated Protein Radical Formation in Differentiating Monocytes
Source: MDPI journal article supplement (doi:10.3390/ijms22189963), 2021-09-15
Supplement: s1 [file s1]

## Supplementary Figure S1

control

150nM PMA

250nM PMA

set 1

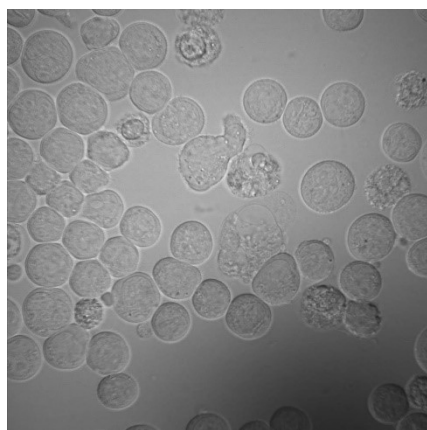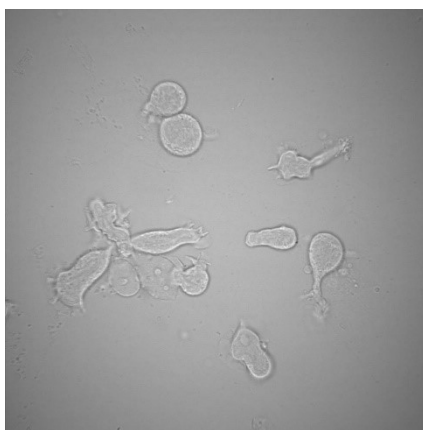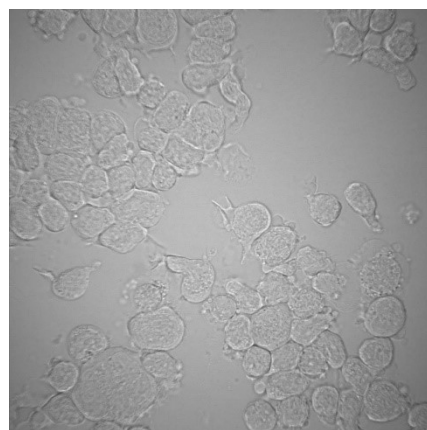

set 2

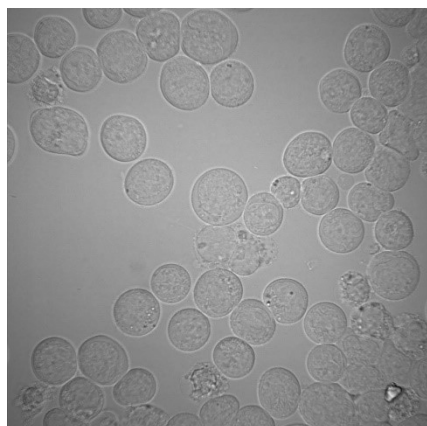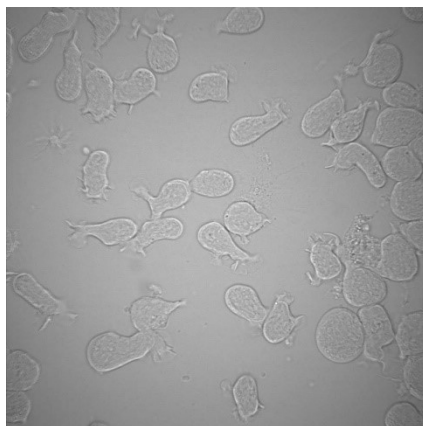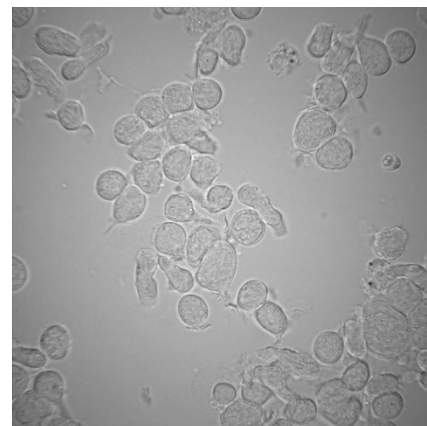

set 3

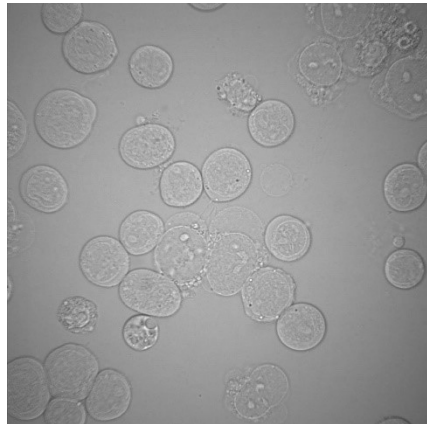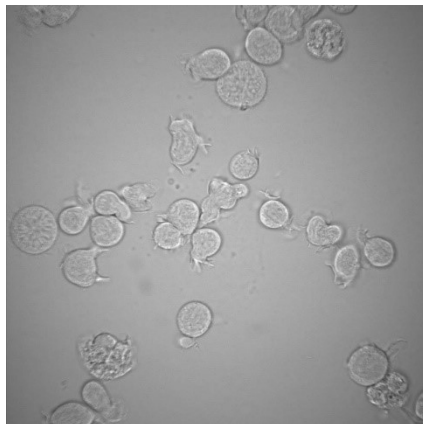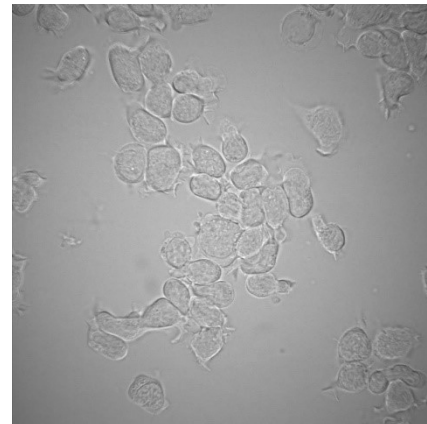

set 4

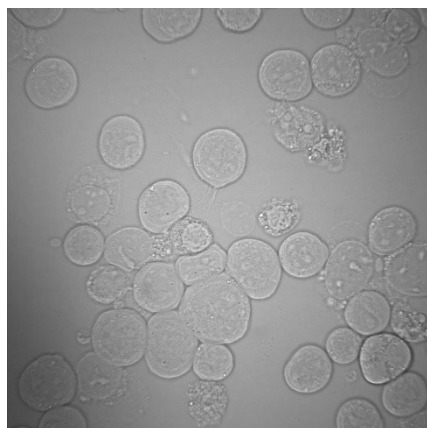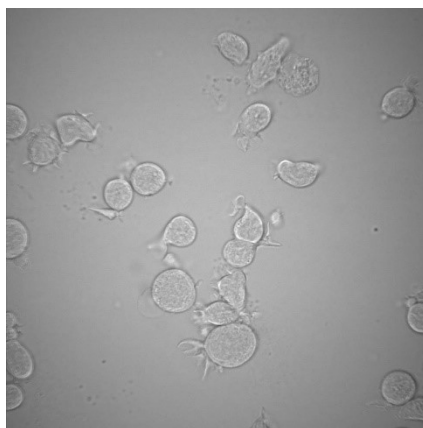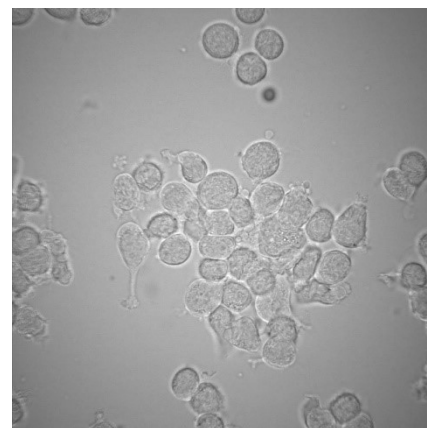

**Supplementary Figure S1:** Morphology of U937 cells in the absence (a) and presence of 150 nM PMA (b) and 250 nM PMA (c) for 72 h at 37° C.

**Supplementary Figure S2**

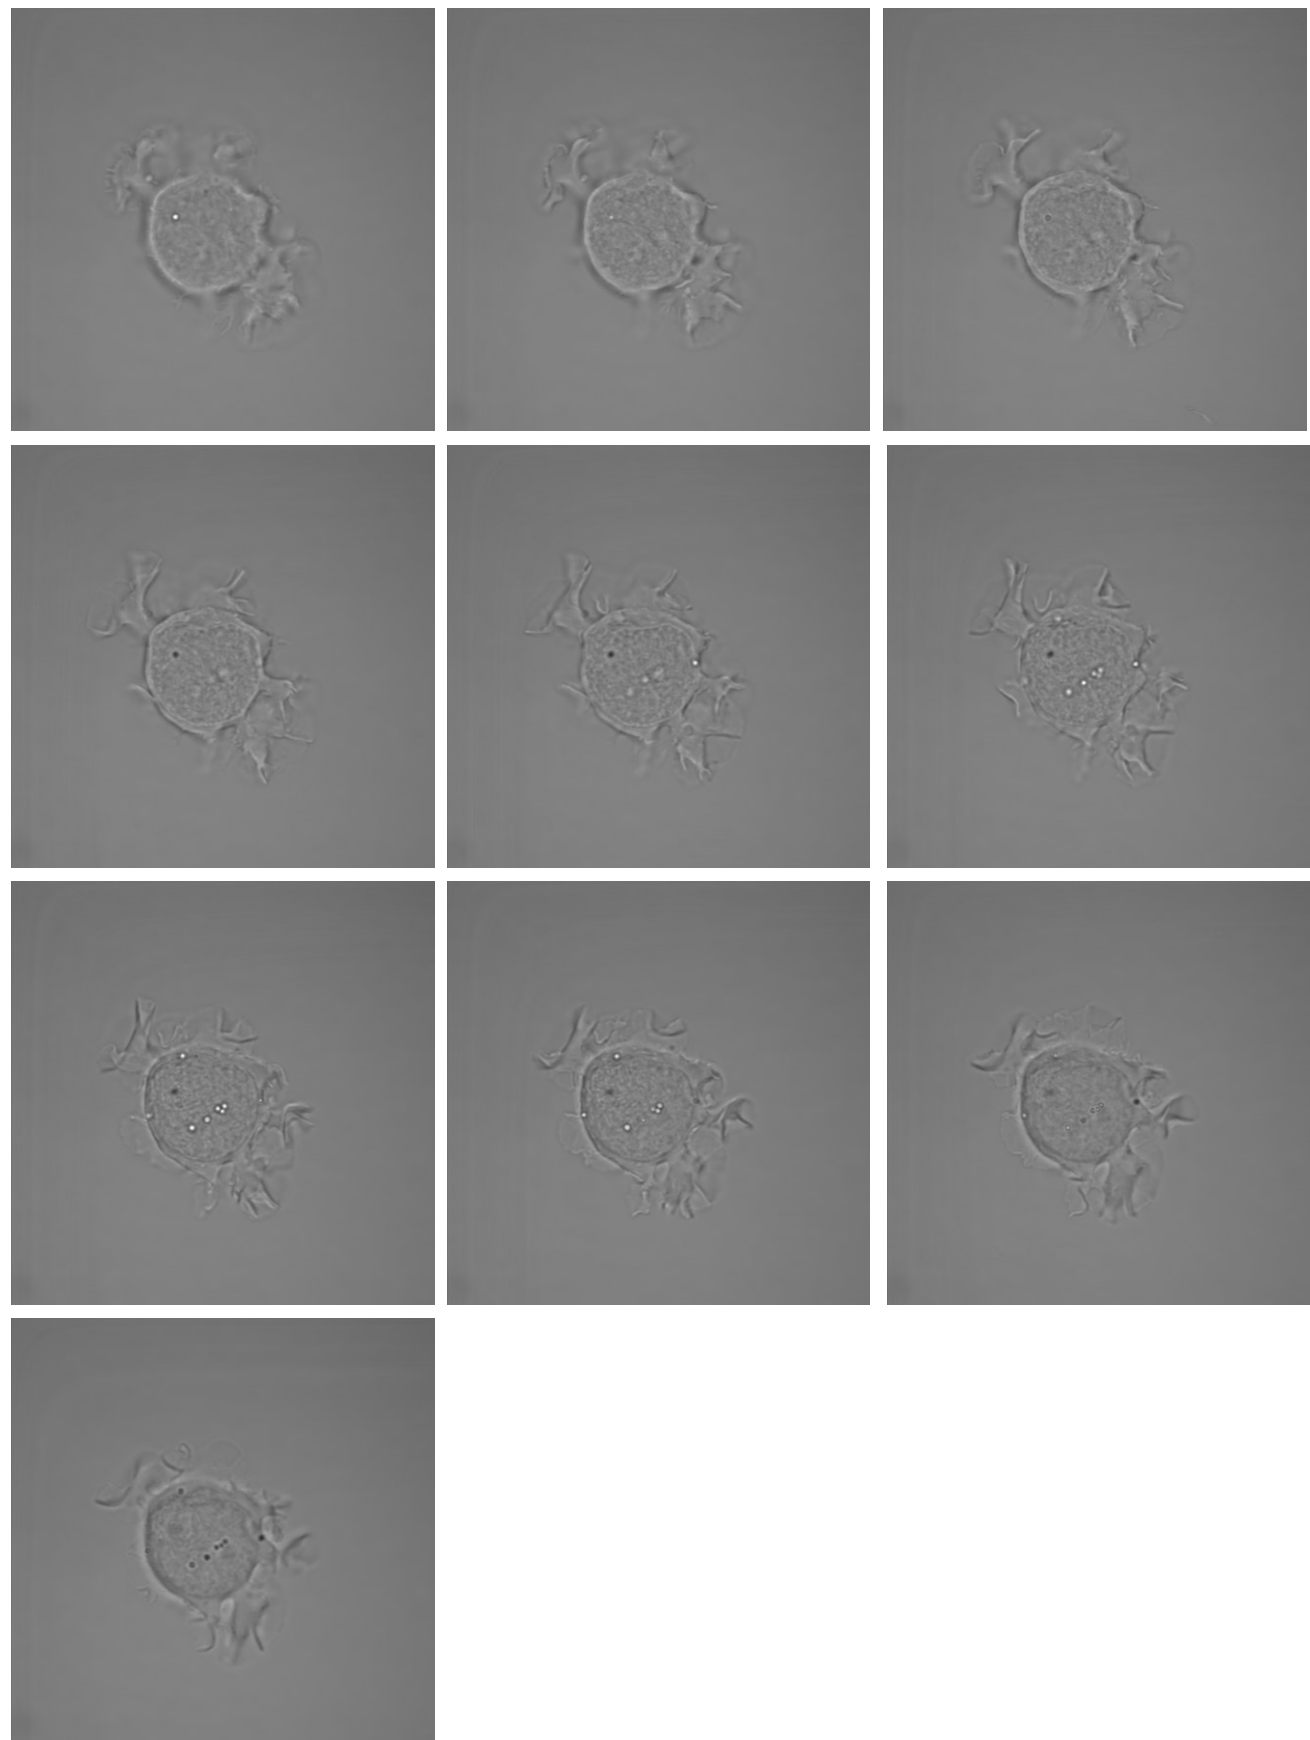

**Supplementary Figure S2:** Z-stack series of 10 optical sections (distance 0.48μm) through a differentiated U-937 cell treated with 150nM PMA for 48h.

# Supplementary Figure S3

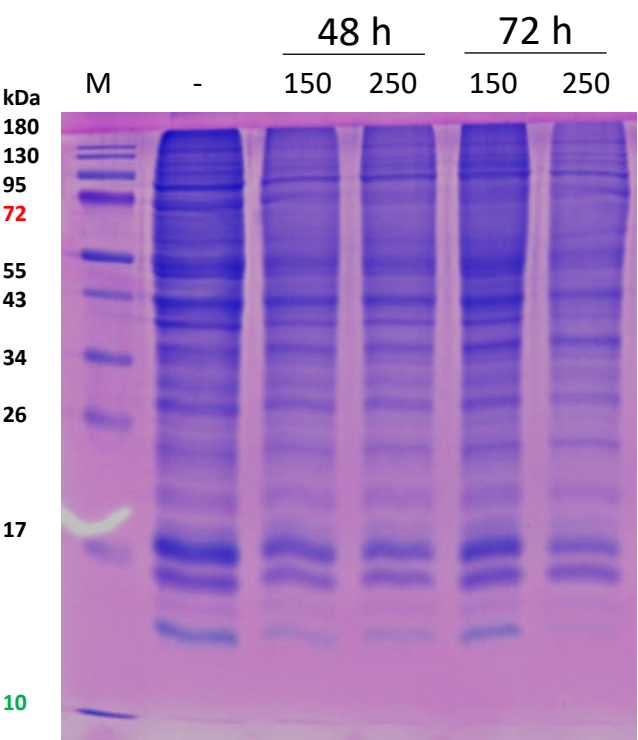

**Supplementary Figure S3:** Coomassie blue staining of cell homogenate treated with 150nM and 250nM PMA for 48 h and 72 h

# Supplementary Figure S4

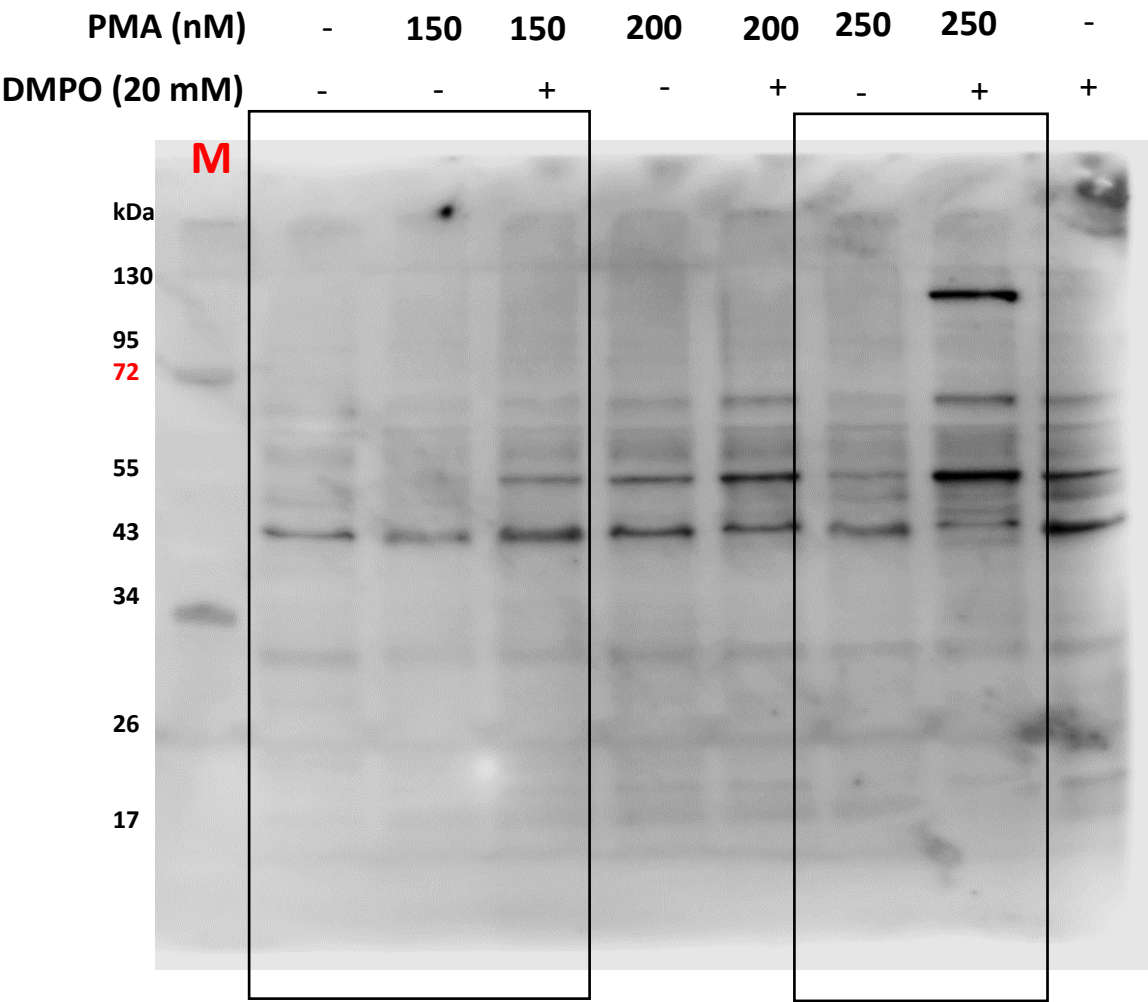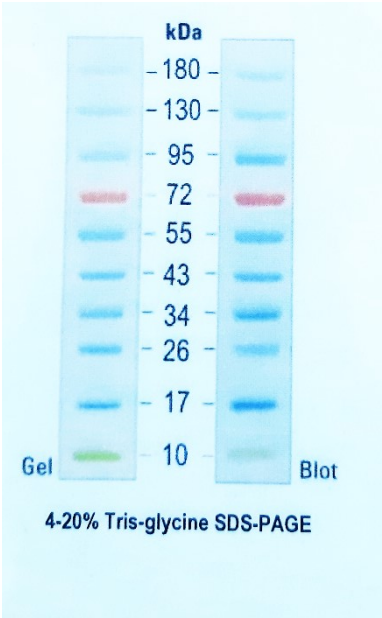

Prestained molecular weight marker

**Supplementary Figure S4:** Western blot analysis of Protein-DMPO nitrosonium adducts in whole cell homogenates treated with 150 nM, 200 nM and 250 nM of PMA for 72h. Lanes marked within the box are parts presented in the article. Lower panel shows the pre-stained molecular marker used.

# Supplementary Figure S5

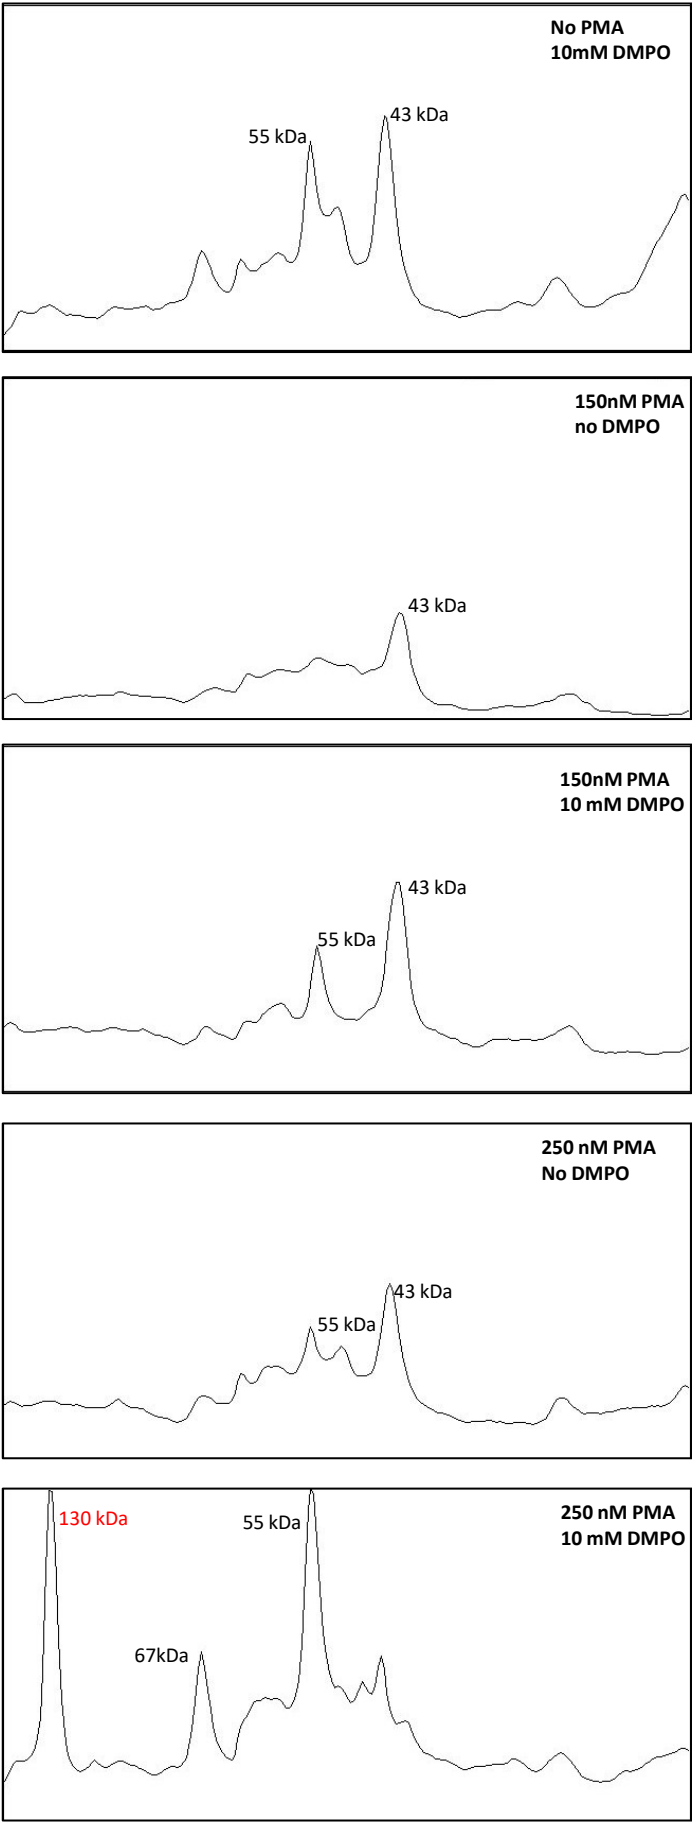

**Supplementary Figure S5:** Densitogram of protein expression pattern in PMA differentiated U-937 cells.

# Supplementary Figure S6

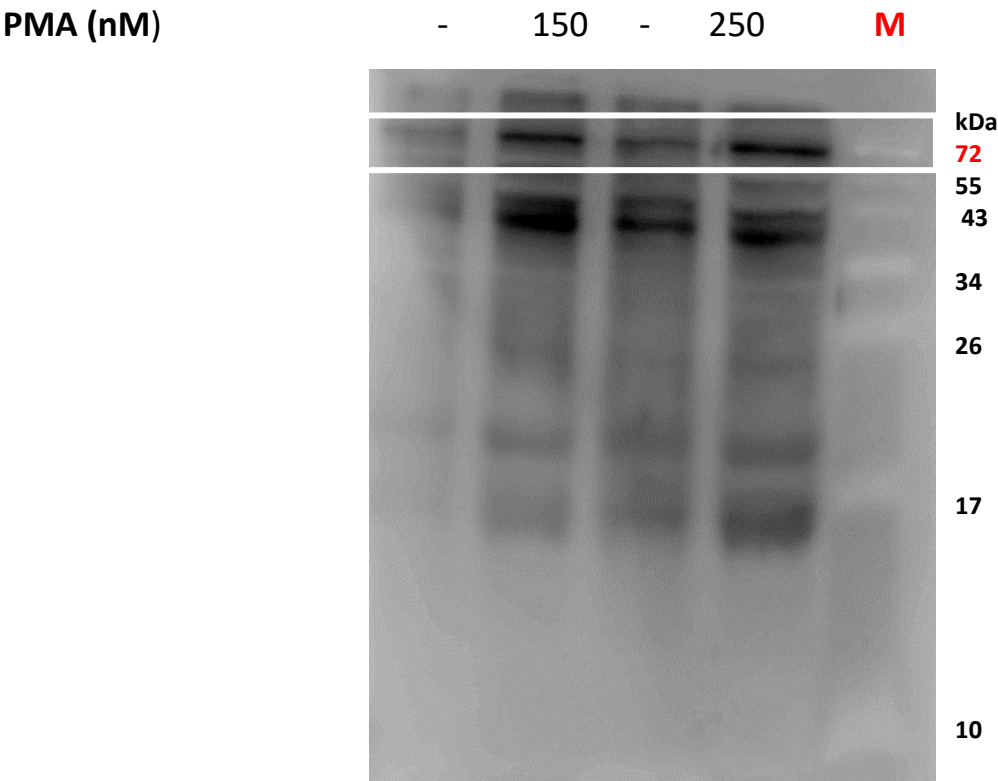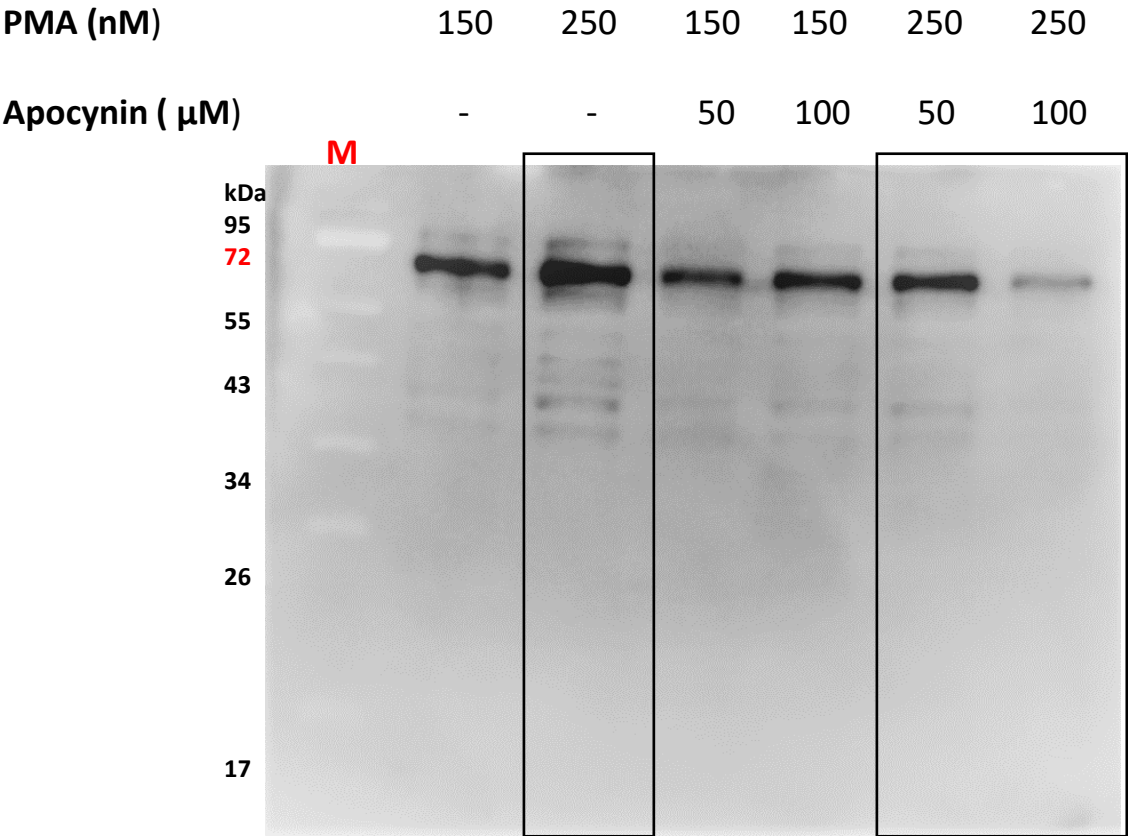

**Supplementary Figure S6:** NOX4 expression analysis in PMA (150nM and 250nM) activated macrophages: western blot analysis of NOX4 expression in whole-cell homogenates pre-treated with 50 μM and 100 μM Apocynin. Lanes marked within the box are parts presented in the article.
